# Supplementary material
Source: PubMed Central journal article supplement (PMC2914605)

**Supplemental Table 1.** Comparison of FlaA and FlaB sequence within strains of *C. jejuni*

| Strain     | Length (AA) <sup>a</sup> | % Identity <sup>b</sup> |
|------------|--------------------------|-------------------------|
| NCTC 11168 | 572                      | 93.9                    |
| 81116      | 576                      | 94.6                    |
| 81-176     | 576                      | 94.8                    |
| Rm1221     | 573                      | 95.3                    |
| F38011     | 580                      | 90.0                    |
| CF93-6     | 572                      | 93.7                    |
| 260.94     | 577                      | 93.6                    |
| 84-25      | 572                      | 93.9                    |

a. AA, amino acids.

b. Percent identity calculated from amino acid sequence.

**Supplemental Table 2.** Primers used in this study

| Primer Name           | Sequence 5' > 3' <sup>a</sup>                     |
|-----------------------|---------------------------------------------------|
| MEK 1001              | AT <u>ACCGCGG</u> GA ACTTGTTAAATGCTATATCGTTAC     |
| MEK 1011              | ATAGAGCT <u>CC</u> TTTAAGCACGATAGATTTGAGTG        |
| MEK 1332              | ATATA <u>CCGCGG</u> ATGGGATTTTCGTATTAACACC        |
| MEK 1334              | ATATA <u>CCGCGG</u> ATGGGTTTTAGGATAAACACC         |
| MEK 1611              | ATATAGAGCT <u>CT</u> AAA ACTTGAATATCTTTTTGCTTGC   |
| MEK 1612              | ATATA <u>CCGCGG</u> TCCTTTTAAAAAATTCAAGCTCATCC    |
| MEK 1613              | ATATAGAGCTCTGAGTAGCGCAGGAAGTGG                    |
| MEK 1614              | ATATA <u>CCGCGG</u> TCCTTTCAA AATATTGCATCGAAAAG   |
| MEK 1655 <sup>b</sup> | GATATTGGTGTTAATACGAAATCC                          |
| MEK 1656 <sup>b</sup> | GCAGCTTTAAATGCAAAGCAAAC                           |
| MEK 1657 <sup>b</sup> | ACCAACATTGGTGTTAATACG                             |
| MEK 1658 <sup>b</sup> | GCTTTAAATGCAAAGCAAACG                             |
| MEK 1659 <sup>b</sup> | ATGTGCATTTAAAGCTGCAACATTG                         |
| MEK 1660 <sup>b</sup> | GCAAACGCTGATTTAAATAGTAAAAG                        |
| MEK 1661 <sup>b</sup> | AACAGCGTTTGCTTTTGCATTTAAAG                        |
| MEK 1662 <sup>b</sup> | TTAAATAGTAAAAGTTTAGATGCTTCTTTAAG                  |
| MEK 1663 <sup>b</sup> | AACATCAGCGTTTGCTTTTGC                             |
| MEK 1664 <sup>b</sup> | AATAGTAAAAGTTTAGATGCTTC                           |
| MEK 1665 <sup>b</sup> | TTCTTTACTATTTAAATCAGCGTTTG                        |
| MEK 1666 <sup>b</sup> | TTAGATGCTTCTTTAAGCAGAC                            |
| MEK 1667 <sup>b</sup> | CTTATCTAAACTTTTACTATTTAAATCAG                     |
| MEK 1668 <sup>b</sup> | TCTTTAAGCAGACTTAGTTCAGG                           |
| MEK 1844              | ATATA <u>CTCGAG</u> TATGCAAATAAAGCTATTATATTTTGTGC |
| MEK 1851              | ATATAGGAT <u>CC</u> AAACTTTTACAATAATCTTTCTAAAGAGC |
| MEK 1858 <sup>b</sup> | ATATAT <u>CTAGAT</u> CAAATCAGAGCCGACATTGG         |
| MEK 1859 <sup>b</sup> | ATATAT <u>CTAGAT</u> TTTGTTATAGCTGTTTCAGC         |
| MEK 1860 <sup>b</sup> | ATATAT <u>CTAGAT</u> CAAATCAGAGCAGACATTGG         |
| MEK 1861 <sup>b</sup> | ATATAT <u>CTAGAT</u> TTTGTTGTGGCTGTTTCAGC         |
| MEK 2015              | ATTAGAATTCTATTGCATCGAAAAGATTAAGC                  |
| MEK 2025              | ATTAGAATT <u>CC</u> ATAGA ACTTTTAGAAGTTCAAG       |
| MEK 2255 <sup>b</sup> | CAGCATTAAATGCACATGCAAATTC                         |
| MEK 2256 <sup>b</sup> | CGATGTTGGTGTTTATCCTAAAAC                          |
| MEK 2257 <sup>b</sup> | ATGTTAATGCTAGAGAACTGGATAAG                        |
| MEK 2258 <sup>b</sup> | CTGAATTTGCATGTGCATTTAATGC                         |
| MEK 2259 <sup>b</sup> | TTAAATGCTAGAGAACTGGATAAGTC                        |
| MEK 2260 <sup>b</sup> | AACTGAATTTGCATGTGCATTTAATG                        |
| MEK 2391 <sup>b</sup> | AAGATCAGCGTTTGCTTTTGC                             |
| MEK 2392 <sup>b</sup> | CAAATCAGCGTTTGCTTTTGC                             |
| MEK 2393 <sup>b</sup> | TAGATCAGCGTTTGCTTTTGC                             |
| MEK 2394 <sup>b</sup> | GAGATCAGCGTTTGCTTTTGC                             |
| MEK 2395 <sup>b</sup> | CAGATCAGCGTTTGCTTTTGC                             |

a. Restriction endonuclease cleavage sites are underlined.

b. Primers with 5' phosphorylation.

**Supplemental Figure 1.** Alignment of *C. jejuni* NCTC 11168 FlaA and FlaB with *S. typhimurium*

LT2 FliC. *C. jejuni* NCTC 11168 FlaA and FlaB were aligned with *S. typhimurium* LT2 FliC at the peptide level using the ClustalW algorithm. A consensus sequence is displayed above the three peptide sequences. Residues that are identical among the three sequences are highlighted in gray.

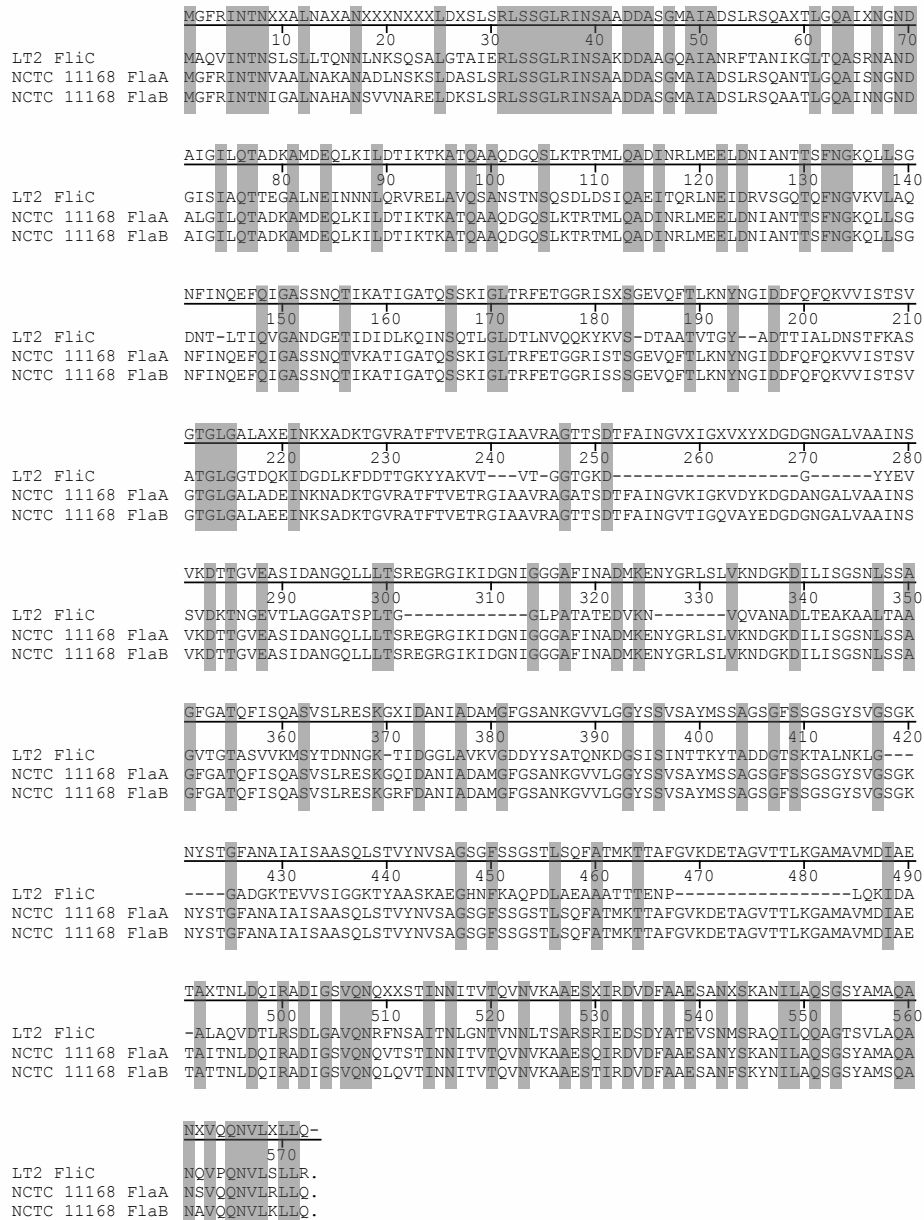

**Supplemental Figure 2.** Immunoblots of wild-type, *flaAB* mutant, and promoter swap strains.

Analysis of FlaA and FlaB protein synthesis in the *C. jejuni* F38011 wild-type strain, F38011 *flaAB* mutant, and F38011 *flaAB* mutant transformed with *PflaA-flaA*. Whole cell lysates were prepared from broth cultures of *C. jejuni* in mid-exponential growth phase, and separated in 12% SDS-polyacrylamide gels. Panels: A) Whole cell lysates; and B) Supernatants probed with a polyclonal serum that recognizes both FlaA and FlaB. The samples in each lane are the: 1) *C. jejuni* F38011 wild-type strain; 2) *C. jejuni* F38011 *flaAB* mutant; and 3) *C. jejuni* F38011 *flaAB* mutant harboring *PflaA-flaA*. The protein loads in the immunoblots (Panels A and B) are normalized according to culture density, so the levels of flagellin can be directly compared.

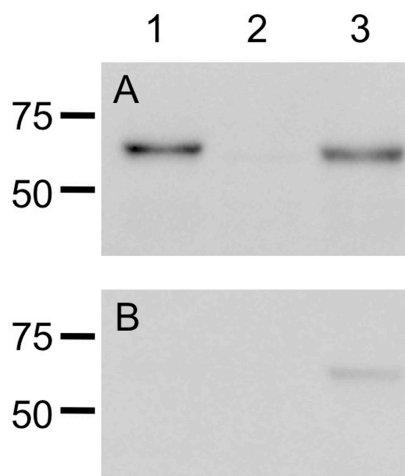

**Supplemental Figure 3.** Phase variation motility plates.

*C. jejuni* F38011 wild-type and the *flaAB* mutant harboring *flaA* expressed from the *flaA* promoter were grown for 48 h on MHB agar plates and diluted in MH soft agar (0.4% agar) to a density that would yield ~30 CFUs when plated. After 48 h incubation, the motility of 500 CFU were observed to determine the percentage of the population that were non-motile. A representative plate of the *flaAB* mutant harboring *flaA* expressed from the *flaA* promoter is shown, which contains only motile colonies. The percentage of non-motile colonies observed for the *C. jejuni* F38011 wild-type strain and the *C. jejuni flaAB* mutant harboring pRY111 containing *flaA* expressed from the *flaA* promoter were 2% and 1.4%, respectively.

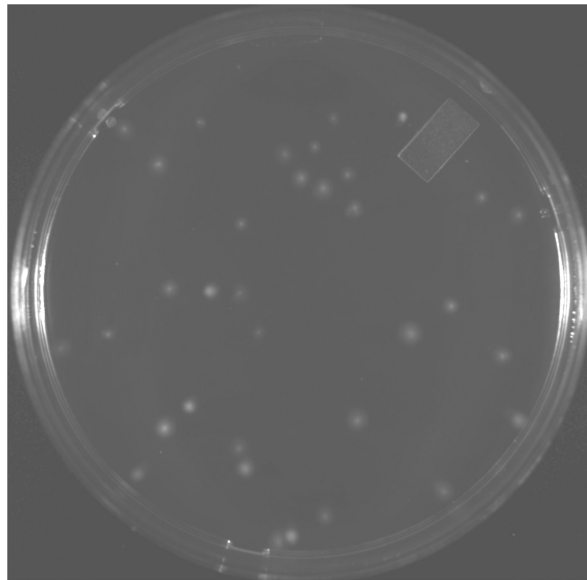

Supplement: NIHMS219018-supplement-Supp_data.pdf [file NIHMS219018-supplement-Supp_data.pdf]
